# Supplementary material
Source: publisher figshare collection journal article supplement (https://frontiersin.figshare.com/ndownloader/files/12714086)

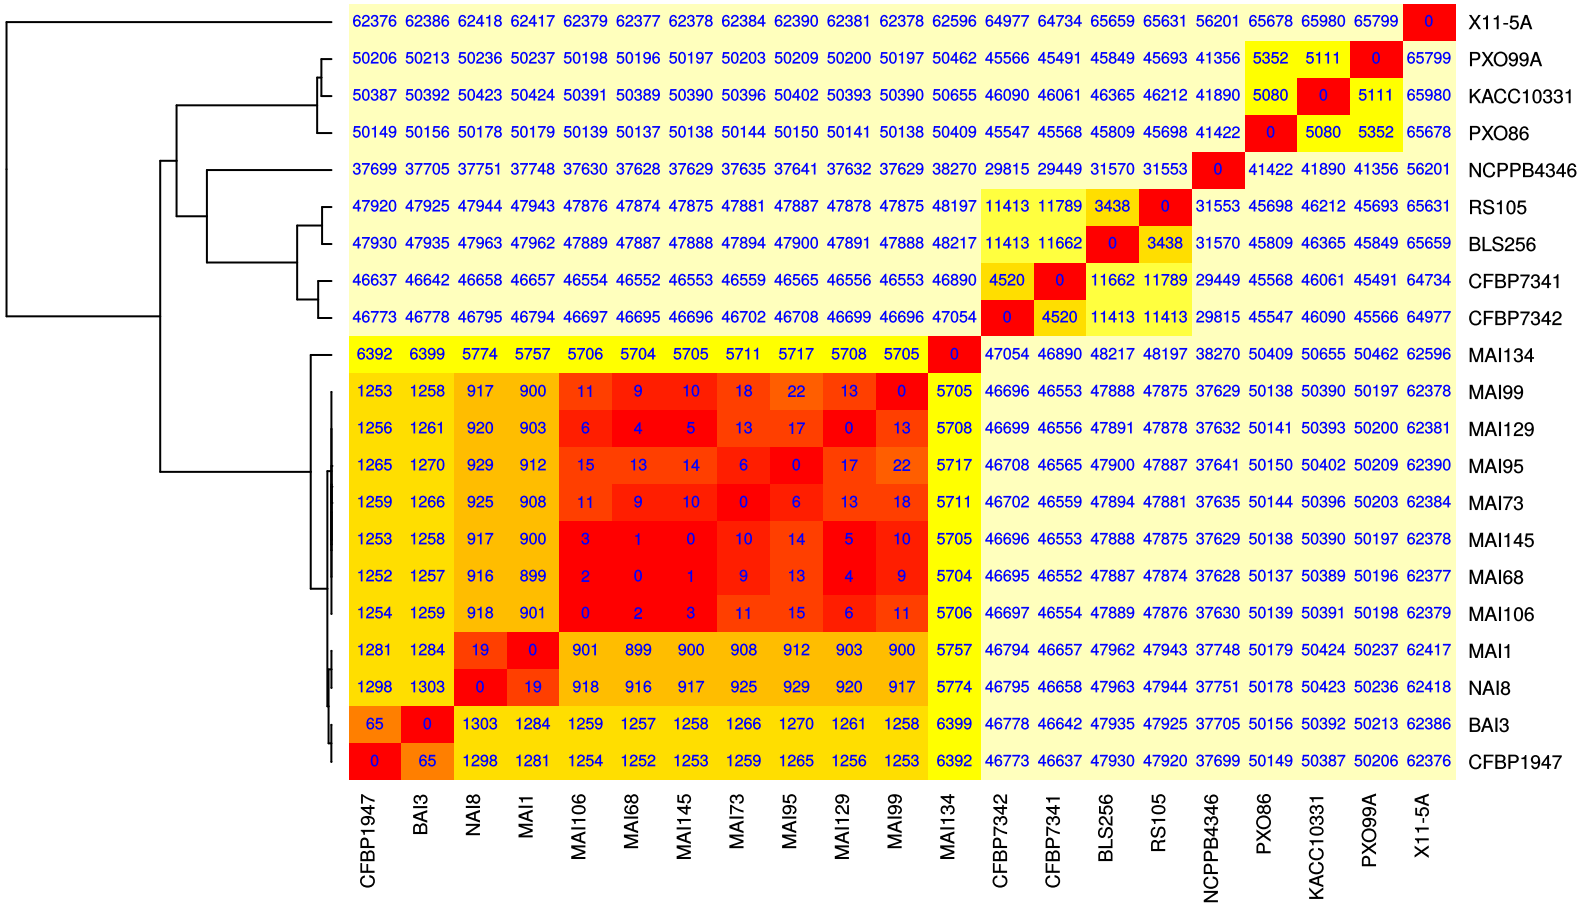

Supplement: Supplementary file [file 12714086]
